# Supplementary material for: Iodide-derived nanostructured silver promotes selective and efficient carbon dioxide conversion into carbon monoxide
Source: Royal Society of Chemistry journal article supplement (doi:10.1039/c8cc00984h), 2018-01-01
Supplement: c8cc00984h1.pdf [file c8cc00984h1.pdf]

## Electronic Supplementary Information

### Experimental section

**Materials:**  $\text{Fe}(\text{NO}_3)_3 \cdot 5\text{H}_2\text{O}$ , KI, PVP and  $\text{KHCO}_3$  were purchased from Aladdin Ltd. (Shanghai, China). Commercially pure Ag foil (99.99%, 0.25 mm in thickness) was purchased from Jia Yun Metal Materials Co., Ltd (Hebei, China). All chemicals were used as received without further purification. The water used throughout all experiments was purified through a Millipore system.

**Synthesis of AgI:** Ag foil was cleaned by sonication sequentially in concentrated HCl, ethanol and water for several times to remove the surface impurities. In a typical synthesis process,  $\text{Fe}(\text{NO}_3)_3 \cdot 5\text{H}_2\text{O}$  (0.5 M), KI (0.5 M), and PVP (150 mM) were dissolved in deionized water. After continuously stirring for 30 min, the resulting mixture was maintained at RT until it became pale brown. The silver foil (2 × 3 cm) was placed in the obtained solution and maintained for 6 h. After that the sample was taken out and thoroughly washed with deionized water and ethanol several times alternatively, followed by drying overnight at 60 °C. In order to further confirm the influence of surface  $\text{I}^-$  on the  $\text{CO}_2$  reduction activity, the Ag nano-coral sample was annealed in a  $\text{H}_2$  atmosphere at 400 °C for 2 h, to remove the adsorbed  $\text{I}^-$  from the Ag surface while retaining the porous structure.

**Characterizations:** XRD measurements were performed using a LabX XRD-6100 X-ray diffractometer with Cu  $\text{K}\alpha$  radiation (40 kV, 30 mA) of wavelength 0.154 nm (SHIMADZU, Japan). SEM measurements were carried out on a XL30 ESEM FEG scanning electron microscope at an accelerating voltage of 20 kV. TEM images were collected on a Zeiss Libra 200FE transmission electron microscope operated at 200 kV.

**Electrochemical measurements:** Electrochemical measurements were performed with a CHI660E potentiostat (CH Instruments, China) in a standard three-electrode setup, using AgI as working electrode, a graphite rod as counter electrode and Ag/AgCl as reference electrode. The potentials reported in this work were calibrated to RHE, using the following equation:  $E(\text{RHE}) = E(\text{Ag/AgCl}) + (0.197 + 0.059 \text{ pH})$

V. Polarization curves were obtained using linear sweep voltammetry with a scan rate of  $5 \text{ mV s}^{-1}$ . The temperature of the solution was maintained at around  $25 \text{ }^\circ\text{C}$  during the whole measurements process. The as-generated gas was carried into a gas chromatograph (SC-3000B online system) every 10 min during  $\text{CO}_2$  electrolysis for detection of products.

**Determination of Faradaic efficiencies of gaseous using Gas Chromatography**

**(GC) Data:** A representative set of GC data obtained during  $\text{CO}_2$  electroreduction on ID-Ag is presented in Table S1.

**Table S1.** Data obtained from the GC analysis of  $\text{CO}_2$  reduction products using ID-Ag. The volume of the sampling loops are  $1 \text{ cm}^3$  (for CO and  $\text{H}_2$ )

| Sample        | Time of sample injection (s) | Current (mA) | Amount of gaseous products (ppm) |              |
|---------------|------------------------------|--------------|----------------------------------|--------------|
|               |                              |              | CO                               | $\text{H}_2$ |
| 1             | 200                          | 4.165        | 748.47                           | 43.56        |
| 2             | 870                          | 4.152        | 746.14                           | 43.42        |
| 3             | 1540                         | 4.08         | 736.85                           | 38.01        |
| 4             | 2210                         | 4.02         | 722.18                           | 41.28        |
| 5             | 2880                         | 4.0          | 716.30                           | 43.36        |
| 6             | 3550                         | 3.97         | 708.67                           | 45.30        |
| Average (3-6) |                              | 4.01         | 721.00                           | 41.99        |

**Calculation of Faradaic efficiencies (%) of gaseous products:**<sup>1</sup> To ensure that the reported data is from a system under equilibrium condition, only the 3<sup>rd</sup> - 6<sup>th</sup> GC measurements were used for calculating the Faradaic efficiencies.

$$\text{Recorded amount of product} = y \text{ (mol)} = Vj \times \frac{PV \times 10^{-3}}{RT}$$

Where  $V_j$ : is volume percentage obtained from the GC analysis of  $\text{CO}_2$  reduction products,  $P = 101.325 \text{ KPa}$ ,  $R = 8.314 \text{ KPa L K}^{-1} \text{ mol}^{-1}$ , Volume of sampling loop =  $V \text{ cm}^3$ ,  $T = 298.15 \text{ K}$

Recorded current =  $I \text{ (A)}$

$$\text{Recorded flow rate} = r \text{ (sccm)} = \frac{r}{60} \text{ cm}^3 \text{ s}^{-1}$$

Number of moles of electrons required for reducing  $\text{CO}_2$  to a particular product:

$$e_{\text{output}} = y \times \text{Number of electrons required to obtain 1 molecule of product}$$

The number of electrons required to form a molecule of  $\text{CO}$  (from  $\text{CO}_2$ ) and  $\text{H}_2$  (from  $\text{H}^+$ ) are both 2 electrons.

Total number of moles of electrons measured during the sampling period:

$$e_{\text{input}} = \frac{Q}{F}$$

where  $F = \text{Faraday constant, } 96485 \text{ C mol}^{-1}$  and  $Q = \text{measured charge}$

The measured charged can be determined using Faraday's laws of electrolysis:

$$Q = I \times t$$

The time required to fill the sampling loop (t):

$$t = \frac{V}{\frac{r}{60}} \text{ seconds}$$

$$\text{Faradaic efficiency of the product} = \frac{e_{\text{output}}}{e_{\text{input}}} \times 100\%$$

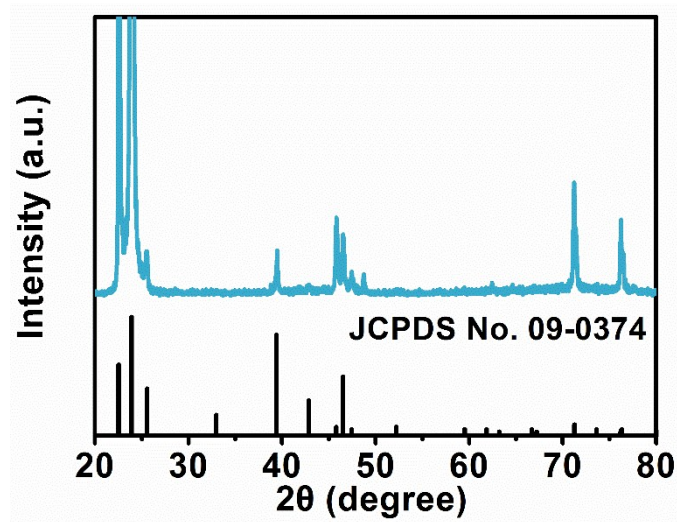

Fig. S1 XRD pattern of of Ag foil.

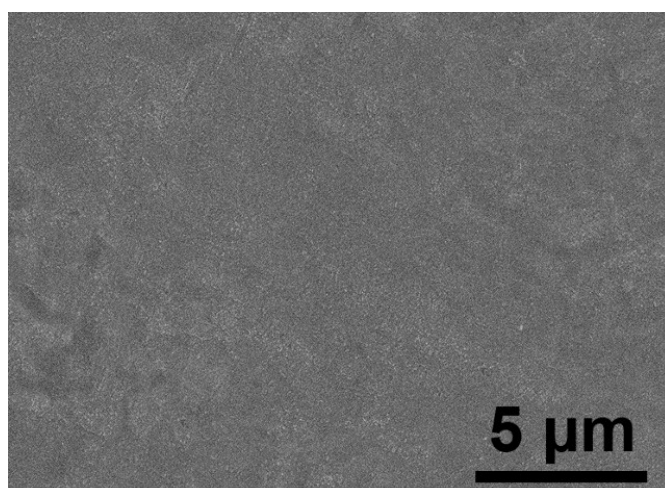

**Fig. S2** SEM image for Ag foil.

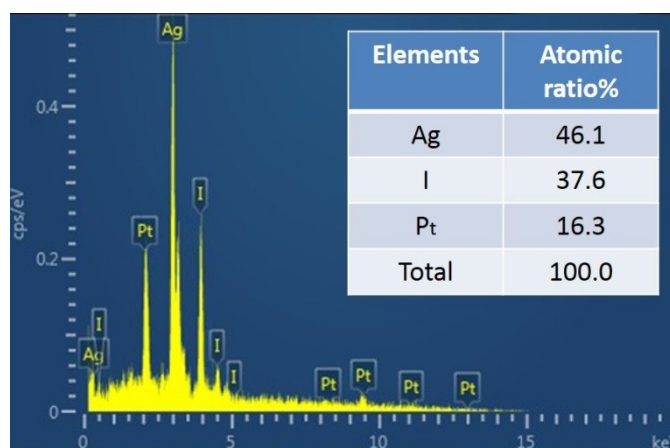

**Fig. S3** EDX spectrum of AgI.

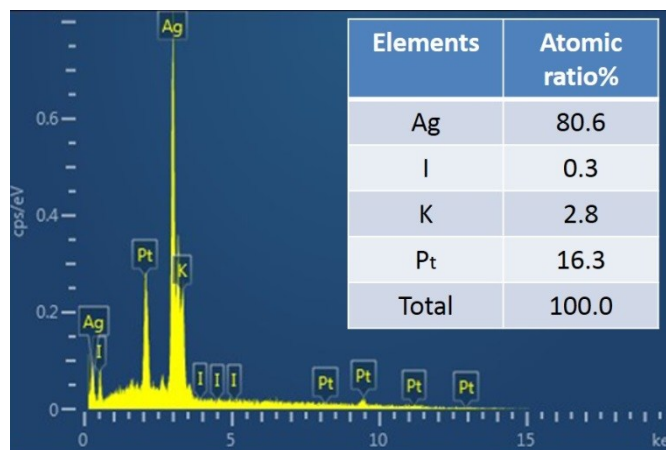

**Fig. S4** EDX spectrum of ID-Ag.

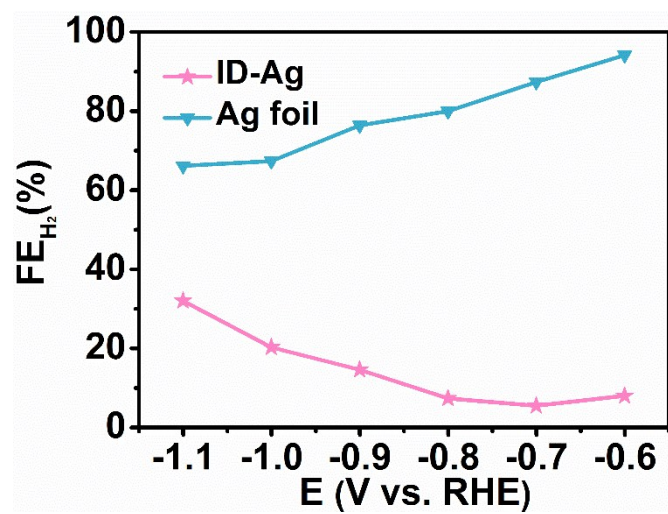

**Fig. S5** Faradaic efficiency for H<sub>2</sub> on Ag foil and ID-Ag at various potentials in CO<sub>2</sub>-saturated in 0.5 M KHCO<sub>3</sub>.



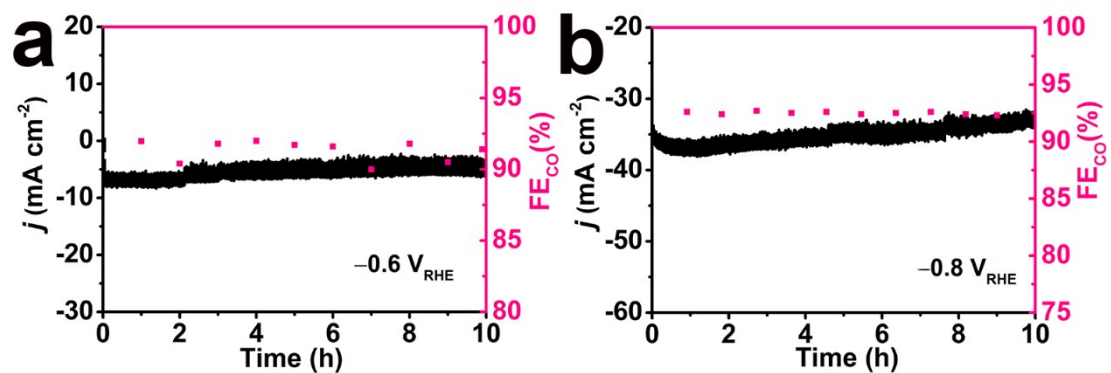

**Fig. S6** The total current density (left axis) and the CO faradaic efficiency (right axis) on ID-Ag at  $-0.7 \text{ V}$  (a) and  $-0.8 \text{ V}$  (b) versus RHE in  $\text{CO}_2$ -saturated  $0.5 \text{ M KHCO}_3$  electrolytes.

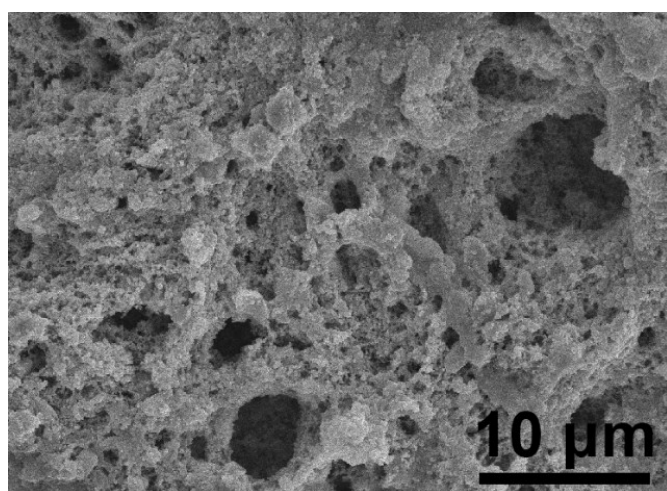

**Fig. S7** SEM image for ID-Ag after H<sub>2</sub> annealing.

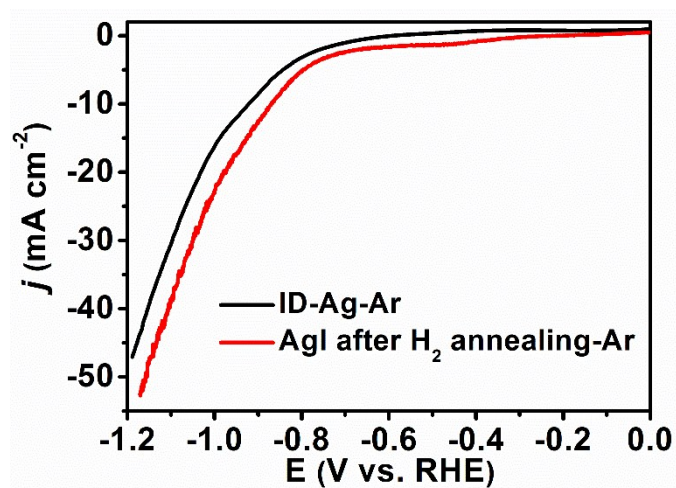

**Fig. S8** Linear sweep voltammetric curves for ID-Ag before (black) and after (red) H<sub>2</sub> annealing measured in Ar-saturated 0.5 M KHCO<sub>3</sub>.

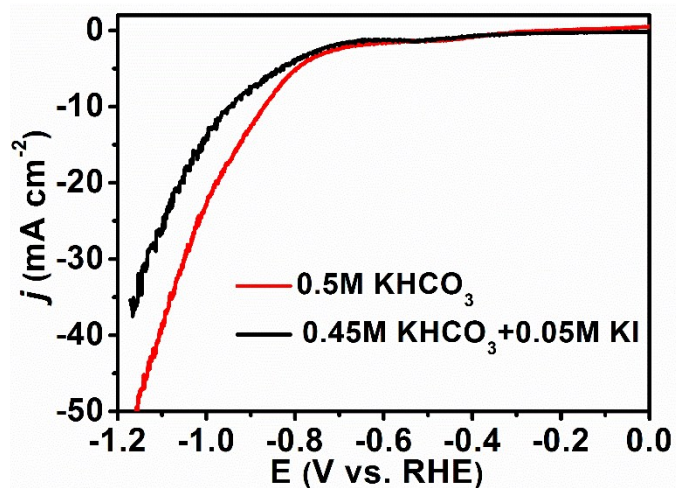

**Fig. S9** Linear sweep voltammetric curves for the ID-Ag after H<sub>2</sub> annealing, as a function of I<sup>-</sup> ion in the electrolyte, measured in Ar-saturated 0.5 M KHCO<sub>3</sub> (black) and measured in Ar-saturated 0.45 M KHCO<sub>3</sub> + 0.05 M KI.

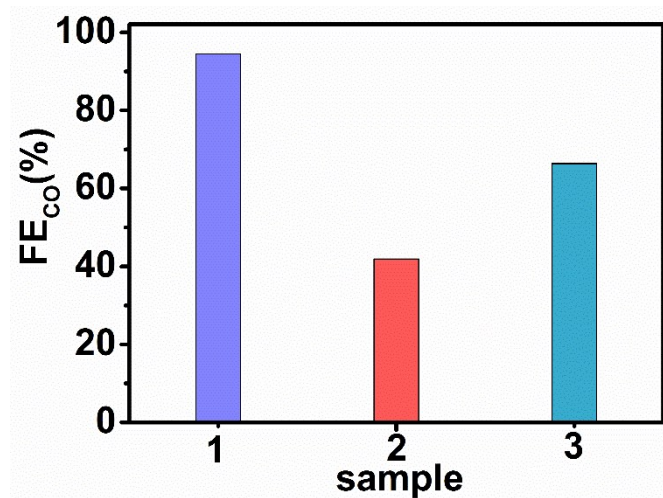

**Fig. S10** Faradaic efficiency for CO on ID-Ag before (sample 1) and after (sample 2) H<sub>2</sub> annealing in CO<sub>2</sub>-saturated 0.5 M KHCO<sub>3</sub>, ID-Ag after H<sub>2</sub> annealing in CO<sub>2</sub>-saturated 0.45 M KHCO<sub>3</sub> + 0.05 M KI (sample 3) at -0.7 V.

**Table S2.** Comparison of CO<sub>2</sub>RR performance for ID-Ag with other Ag-based electrocatalysts.

| Catalyst                                | Potential           | Electrolyte                                                                    | FE(%)                | Ref.      |
|-----------------------------------------|---------------------|--------------------------------------------------------------------------------|----------------------|-----------|
| ID-Ag                                   | -0.7 V              | 0.5 M KHCO <sub>3</sub>                                                        | 94.5                 | This work |
| coral-like Ag                           | -0.47 V             | 0.1 M KHCO <sub>3</sub>                                                        | 95                   | 2         |
| triangular silver nanoplates            | -0.855 V            | 0.1 M KHCO <sub>3</sub>                                                        | 96.8                 | 3         |
| Ag foil                                 | -1.72 V vs. Pt wire | 1-butyl-3-methyl-imidazolium trifluoromethanesulfonates in propylene carbonate | 63.3                 | 4         |
| plasma-treated Ag foils                 | -0.6 V              | 0.1 M KHCO <sub>3</sub>                                                        | 90                   | 5         |
| Ag nanoparticles<br>3 nm<br>5nm<br>10nm | -0.75 V             | 0.5 M KHCO <sub>3</sub>                                                        | 76.8<br>88.4<br>70.5 | 6         |
| Bulk Ag                                 | -1.5 V              | EMIM-BF <sub>4</sub> in water                                                  | 96                   | 7         |
| oxide-derived nanostructured Ag         | -0.59 V             | 0.1 M KHCO <sub>3</sub>                                                        | 80                   | 8         |
| nanoporous silver Ag                    | -0.5 V              | 0.5 M KHCO <sub>3</sub>                                                        | 90                   | 9         |
| Ag-IO                                   | -0.7 V              | 0.1 M KHCO <sub>3</sub>                                                        | 80                   | 10        |

|                     |       |         |    |    |
|---------------------|-------|---------|----|----|
| Ag/TiO <sub>2</sub> | -1.7V | 1 M KOH | 90 | 11 |
|---------------------|-------|---------|----|----|

## References

- 1 C. Chen, A. D. Handoko, J. Wan, L. Ma, D. Ren and B. S. Yeo, *Catal. Sci. Technol.*, 2015, **5**, 161–168.
- 2 Y.-C. Hsieh, S. D. Senanayake, Y. Zhang, W. Xu and D. E. Polyansky, *ACS Catal.*, 2015, **5**, 5349–5356.
- 3 S. Liu, H. Tao, L. Zeng, Q. Liu, Z. Xu, Q. Liu and J. L. Luo, *J. Am. Chem. Soc.*, 2017, **139**, 2160–2163.
- 4 J. Shi, F. Shi, N. Song, J.-X. Liu, X.-K. Yang, Y.-J. Jia, Z.-W. Xiao and P. Du, *J. Power Sources*, 2014, **259**, 50–53.
- 5 H. Mistry, Y.-W. Choi, A. Bagger, F. Scholten, C. S. Bonifacio, I. Sinev, N. J. Divins, I. Zegkinoglou, H. S. Jeon, K. Kisslinger, E. A. Stach, J. C. Yang, J. Rossmeisl and B. R. Cuenya, *Angew. Chem., Int. Ed.*, 2017, **56**, 11394–11398.
- 6 C. Kim, H. S. Jeon, T. Eom, M. S. Jee, H. Kim, C. M. Friend, B. K. Min and Y. J. Hwang, *J. Am. Chem. Soc.*, 2015, **137**, 13844–13850.
- 7 B. A. Rosen, A. Salehi-Khojin, M. R. Thorson, W. Zhu, D. T. Whipple, P. J. A. Kenis and R. I. Masel, *Science*, 2011, **334**, 643–644.
- 8 M. Ma, B. J. Trzeźniewski, J. Xie and W. A. Smith, *Angew. Chem., Int. Ed.*, 2016, **55**, 9748–9752.
- 9 Q. Lu, J. Rosen, Y. Zhou, G. S. Hutchings, Y. C. Kimmel, J. G. Chen and F. Jiao, *Nat. Commun.*, 2014, **5**, 3242.
- 10 Y. Yoon, A. S. Hall and Y. Surendranath, *Angew. Chem., Int. Ed.*, 2016, **55**, 15282–15286.
- 11 S. Ma, Y. Lan, G. M. J. Perez, S. Moniri and P. J. A. Kenis, *ChemSusChem*, 2014, **7**, 866–874.
